# Supplementary material for: Selective Antitumor Activity of Datelliptium toward Medullary Thyroid Carcinoma by Downregulating RET Transcriptional Activity
Source: MDPI journal article supplement (doi:10.3390/cancers13133288), 2021-06-30
Supplement: s1 [file s1]

# Figure 1

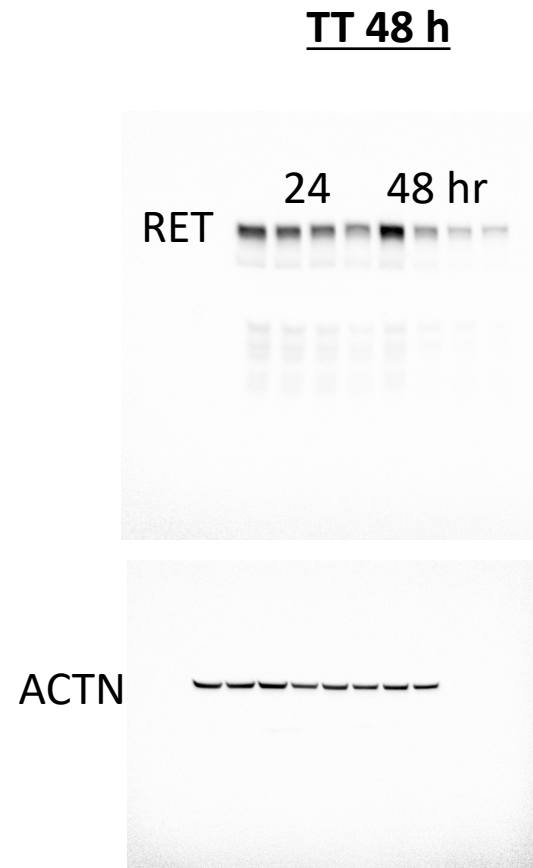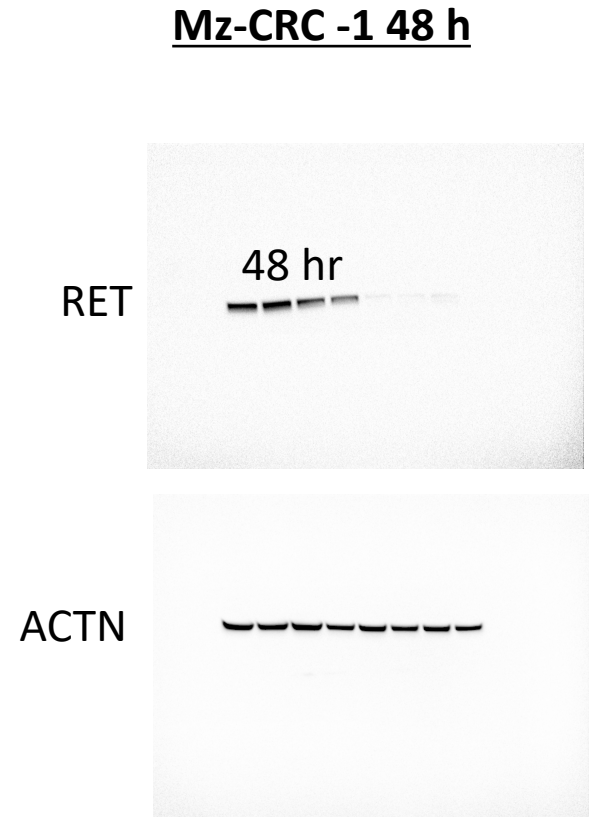

# Figure 2

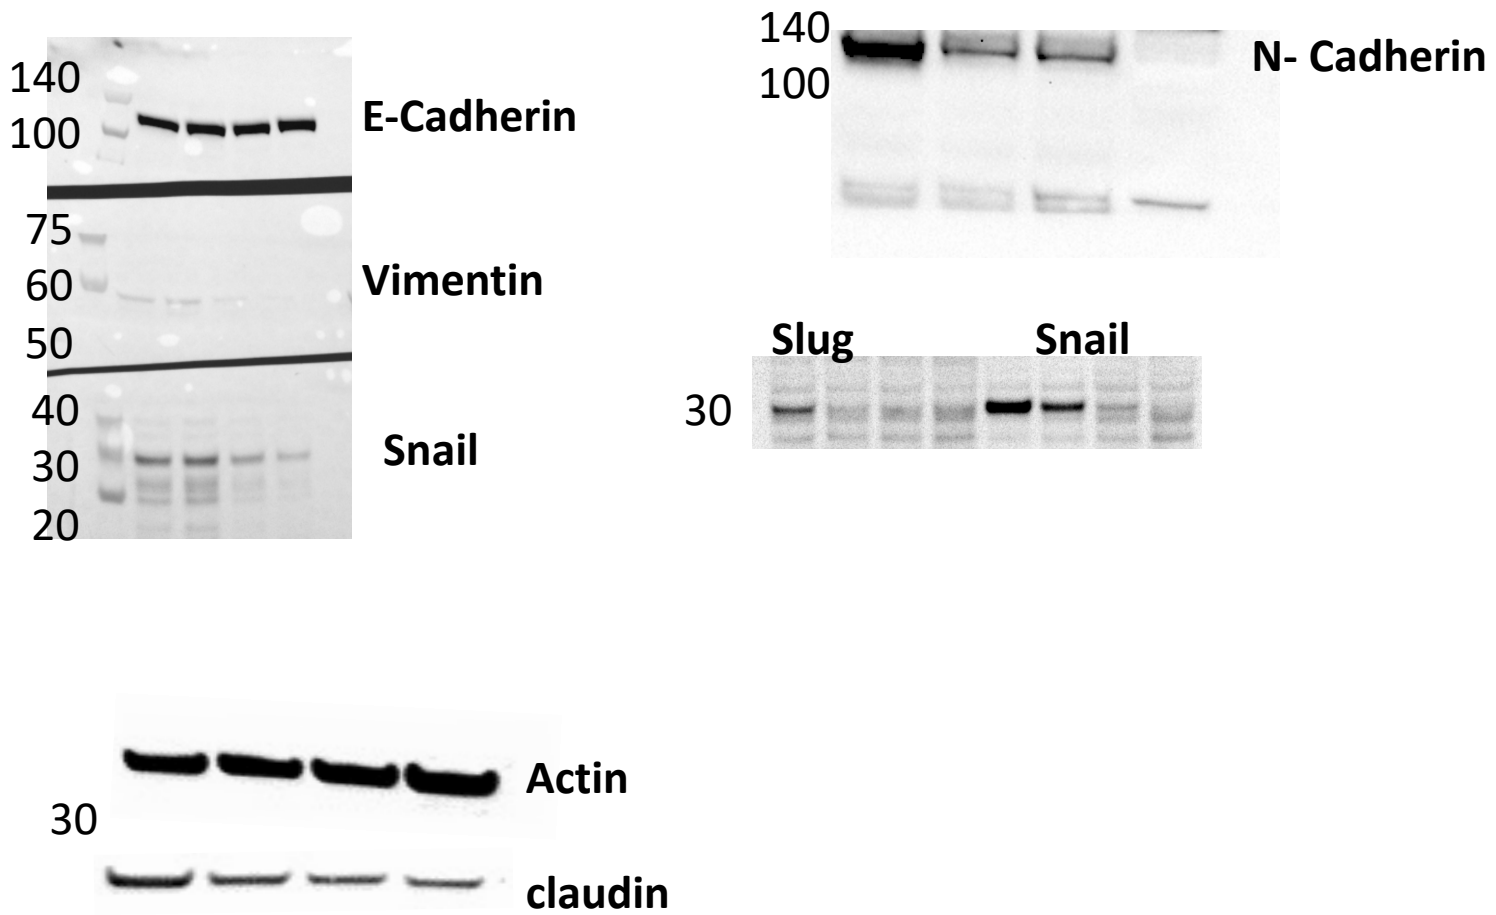

# Figure 5A for TT 48 hours

TT 48 h

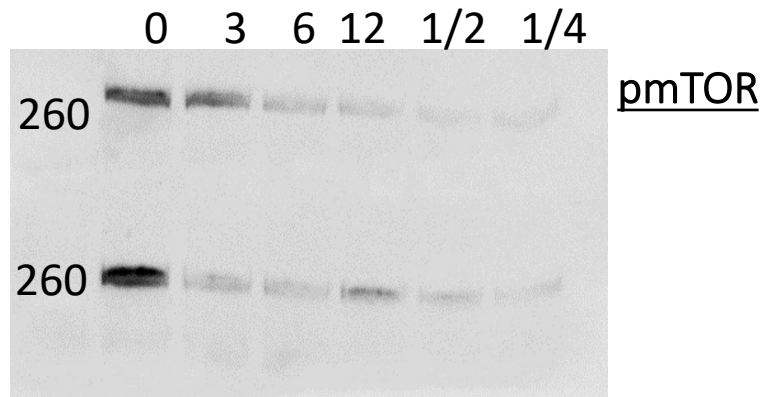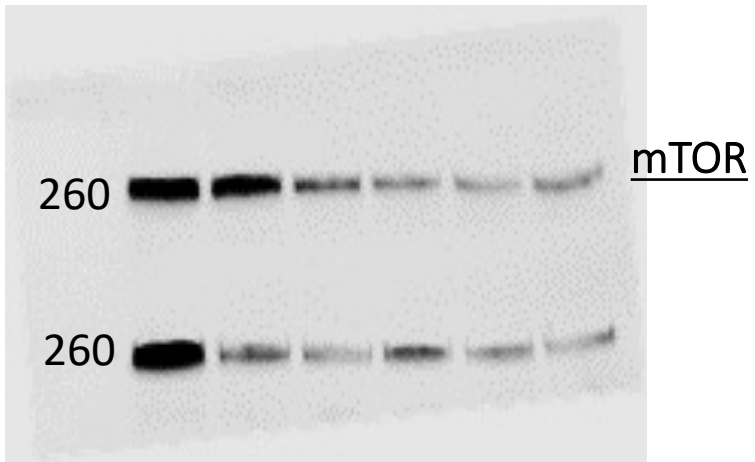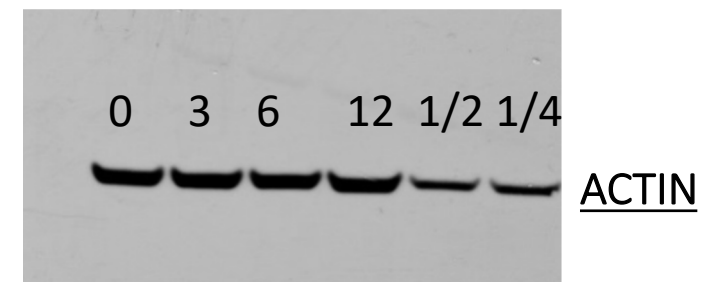

Mz-CRC 48 h

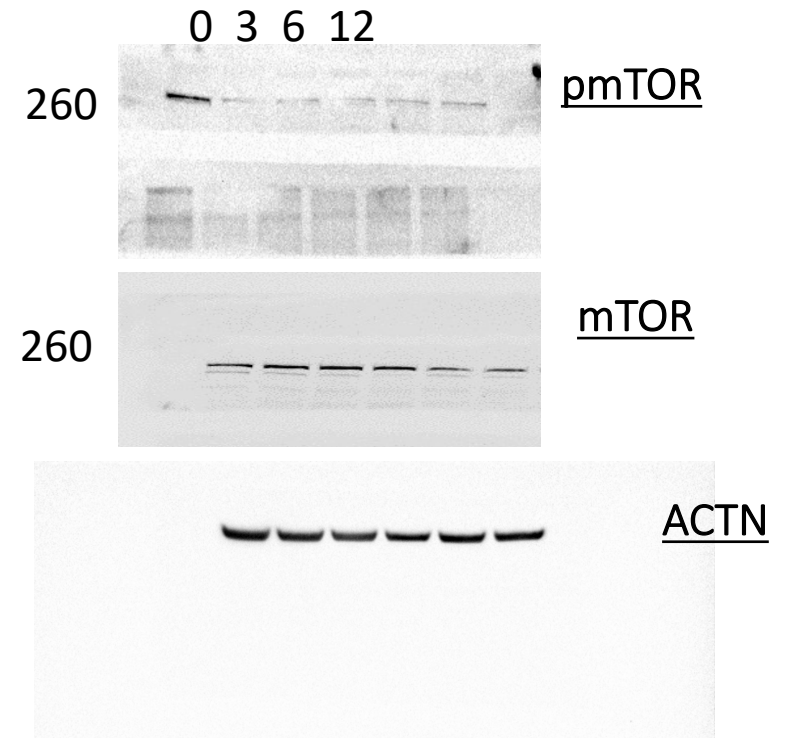

# Figure 5 B

TT 48 h

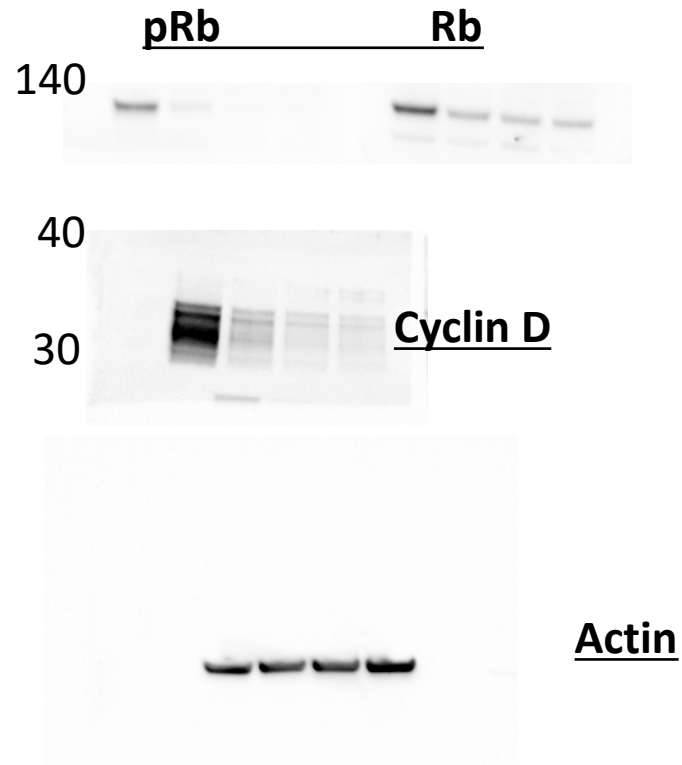

Mz-CRC -1 48 h

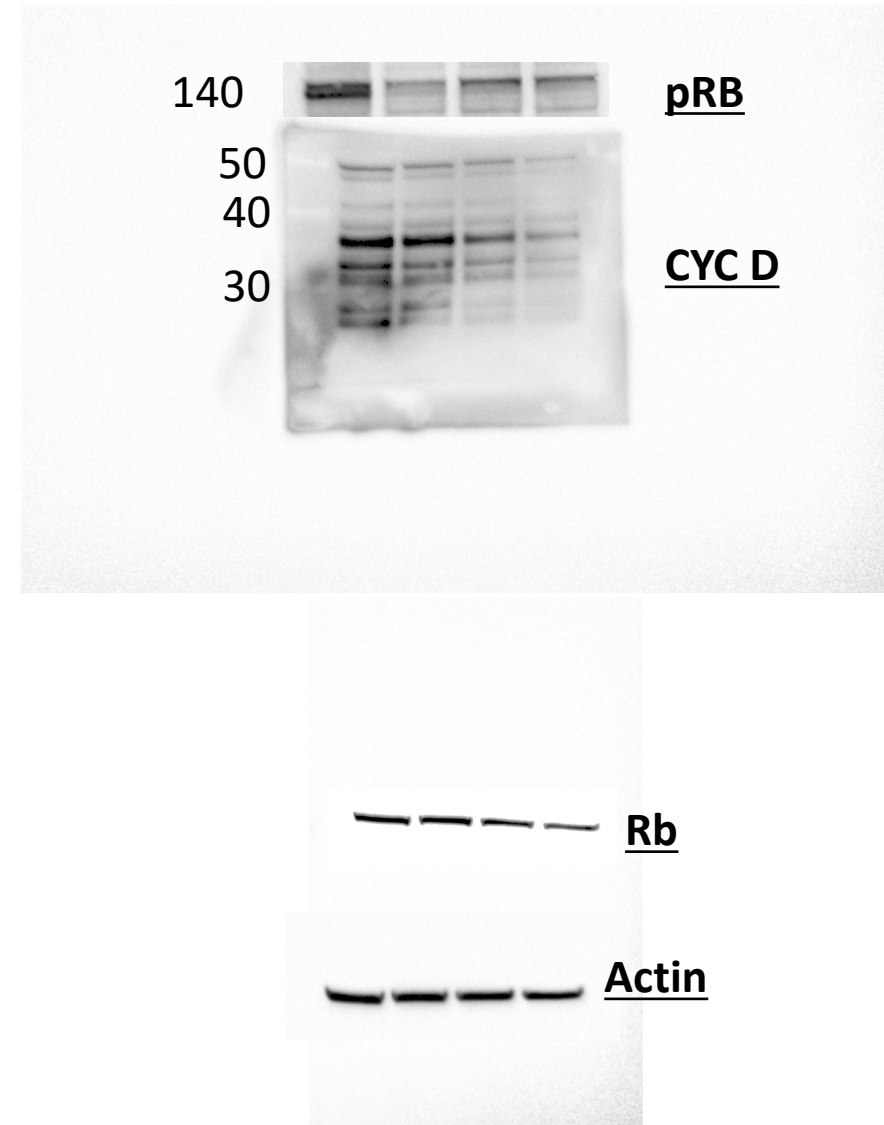

# Figure 6

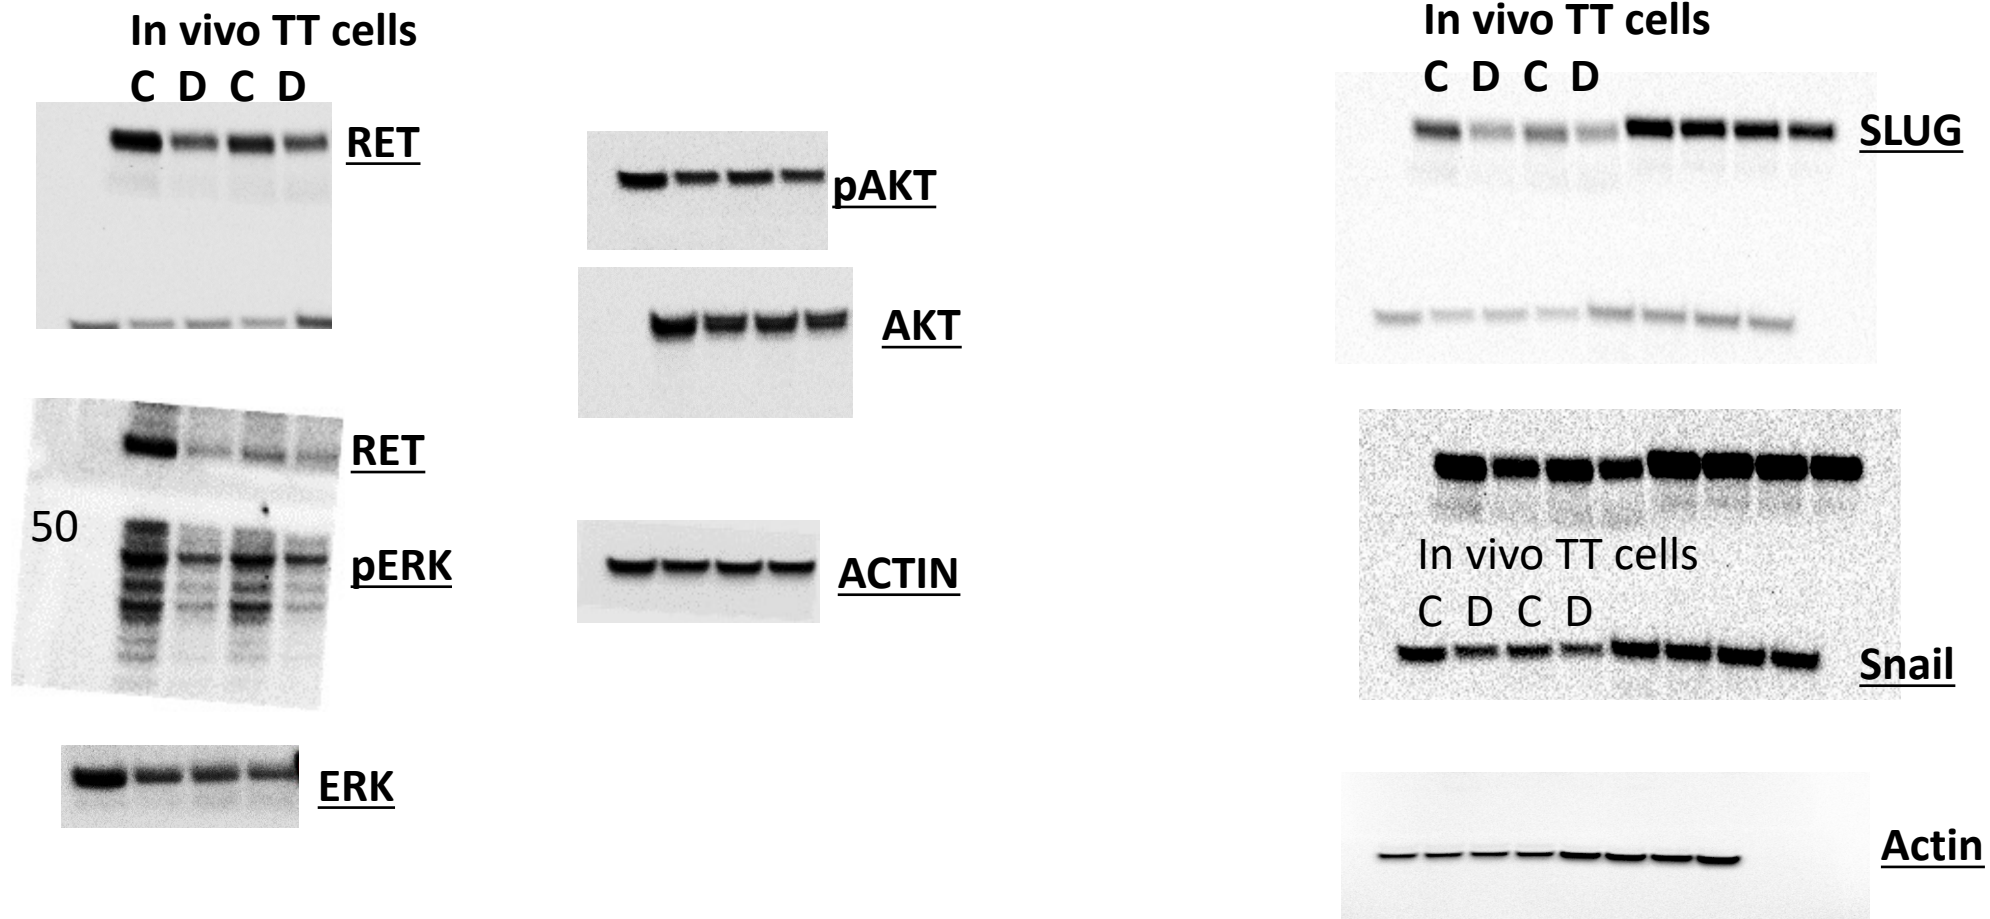

C= control  
D= Datelliptium
